# Supplementary material for: CCN2 deficiency in smooth muscle cells triggers cell reprogramming and aggravates aneurysm development
Source: JCI journal article supplement (doi:10.1172/jci.insight.162987), 2023-01-09
Supplement: sd1 [file 1]

## Supplementary Materials for

# **CCN2 deficiency in smooth muscle cells triggers cell reprogramming and aggravates aneurysm development**

Yu Wang<sup>1</sup>, Xuesong Liu<sup>1,2</sup>, Qian Xu<sup>1</sup>, Wei Xu<sup>1</sup>, Xianming Zhou<sup>1,3</sup>, Zhiyong Lin<sup>1</sup>

## Supplemental Figures

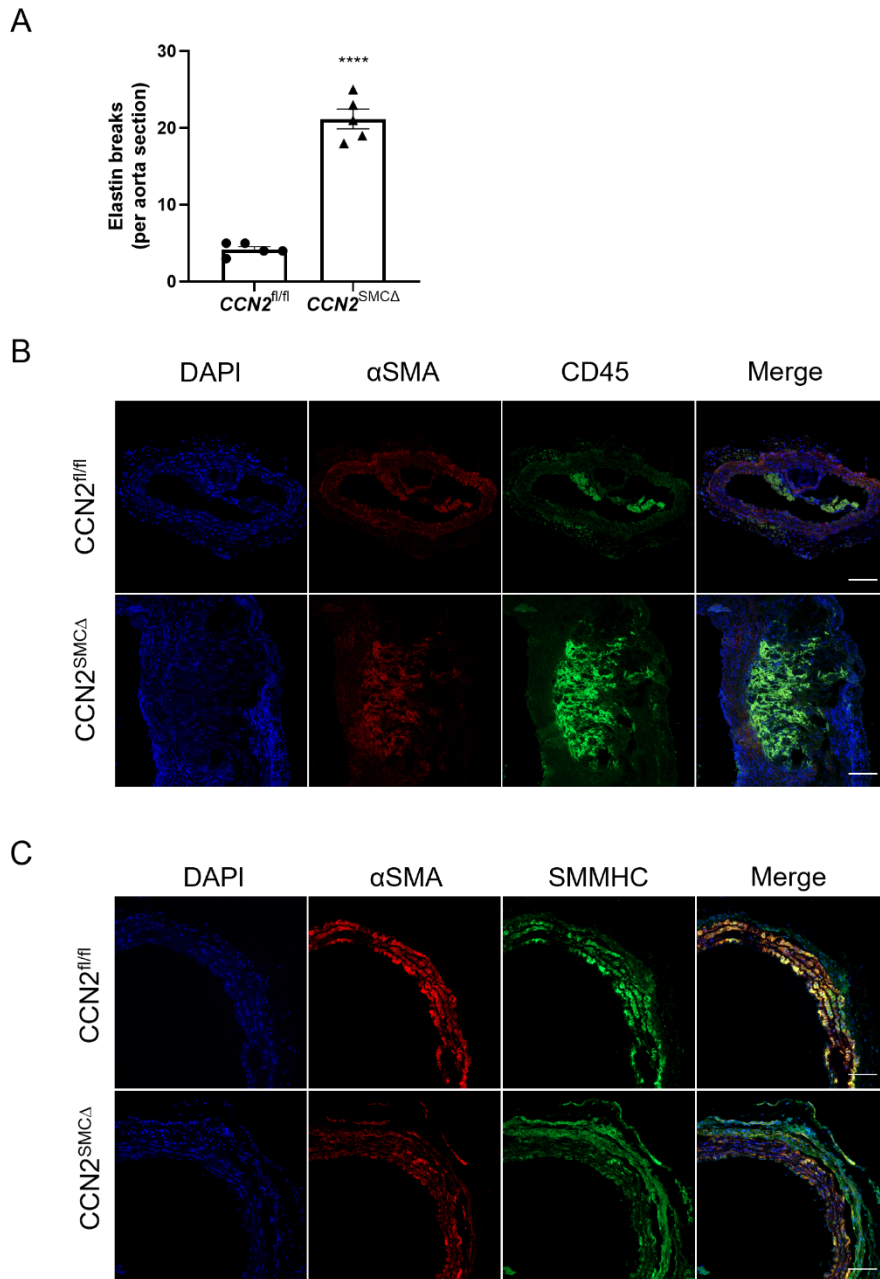

**Figure S1. (A)** Quantification of elastin breaks (counts per aorta section, 42-day Ang II infusion),  $n=5$ . Data were quantified and represented as mean  $\pm$  SEM, \*\*\*\*,  $P<0.0001$ , 2-tailed Student's  $t$  test. **(B)** Immunofluorescence double staining of infrarenal aortic sections from CCN2<sup>fl/fl</sup> and CCN2<sup>SMCΔ</sup> mice with specific antibodies against SM- $\alpha$ -actin (red) and CD45 (green). Nuclei were stained with DAPI (blue),  $n=3$ . **(C)** Immunofluorescence double staining of upper abdominal aortic sections (no dilations) from both groups with specific antibodies against SM- $\alpha$ -actin (red) and SMMHC (green). Nuclei were stained with DAPI (blue),  $n=3$ . Scale bars, 100  $\mu$ m.

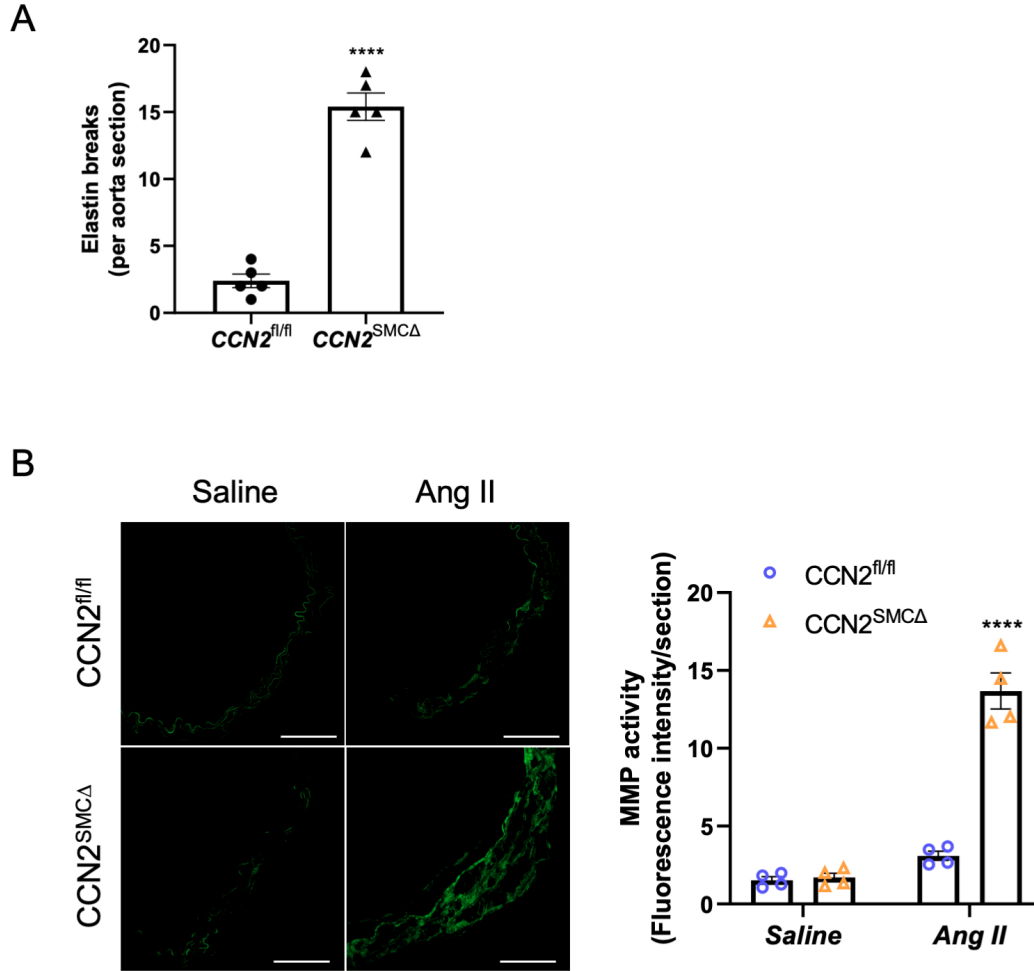

**Figure S2. (A)** Quantification of elastin breaks (counts per aorta section, 7-day Ang II infusion),  $n=5$ . **(B)** In situ zymography analysis of MMPs activity in infrarenal aortic sections from  $CCN2^{fl/fl}$  and  $CCN2^{SMCA}$  mice infused with saline or Ang II ( $n=4$ ). Total MMPs activity are indicated by positive green signals and quantified as fluorescence intensity per section. Scale bars, 100  $\mu$ m. Data were represented as mean  $\pm$  SEM, \*\*\*\*,  $P<0.0001$ , 2-way ANOVA.

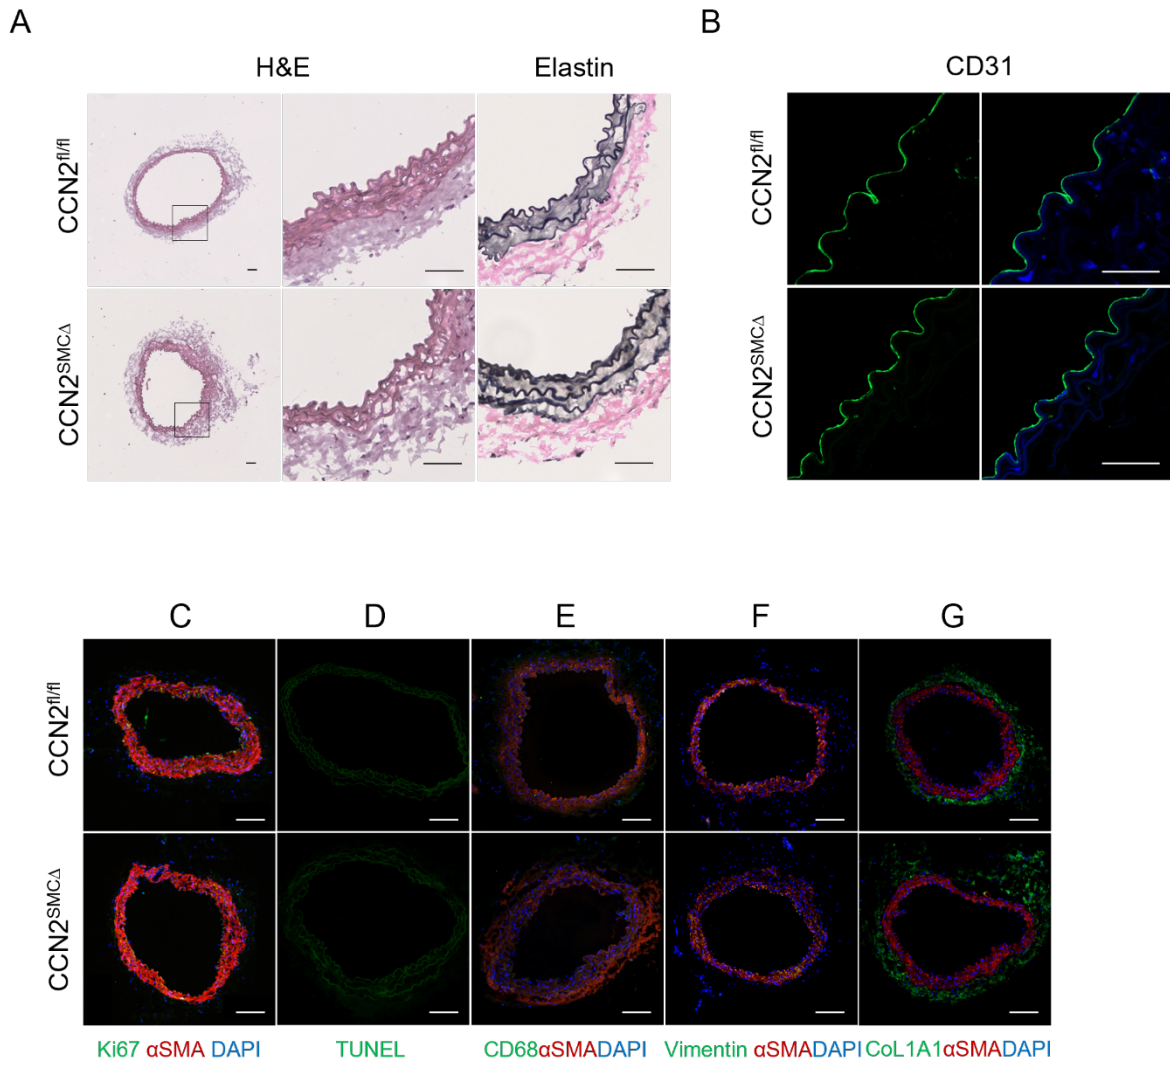

**Figure S3. (A)** Representative images of hematoxylin/eosin-stained (5x and 20x) and Elastin-stained (20x) abdominal aortic sections from saline-infused CCN2<sup>fl/fl</sup> and CCN2<sup>SMCΔ</sup> mice (n=4). Scale bars, 100 μm. **(B)** Immunofluorescence staining of abdominal aortic sections from both groups with specific antibodies against CD31 (green). Nuclei were stained with DAPI (blue). Scale bars, 100 μm, n=4. Abdominal aortic sections (non-aneurysm) from saline-infused CCN2<sup>fl/fl</sup> and CCN2<sup>SMCΔ</sup> mice stained with Ki67/αSMA **(C)**, TUNEL **(D)**, CD68/αSMA **(E)**, Vimentin/αSMA **(F)** and Col1A1/αSMA **(G)**.

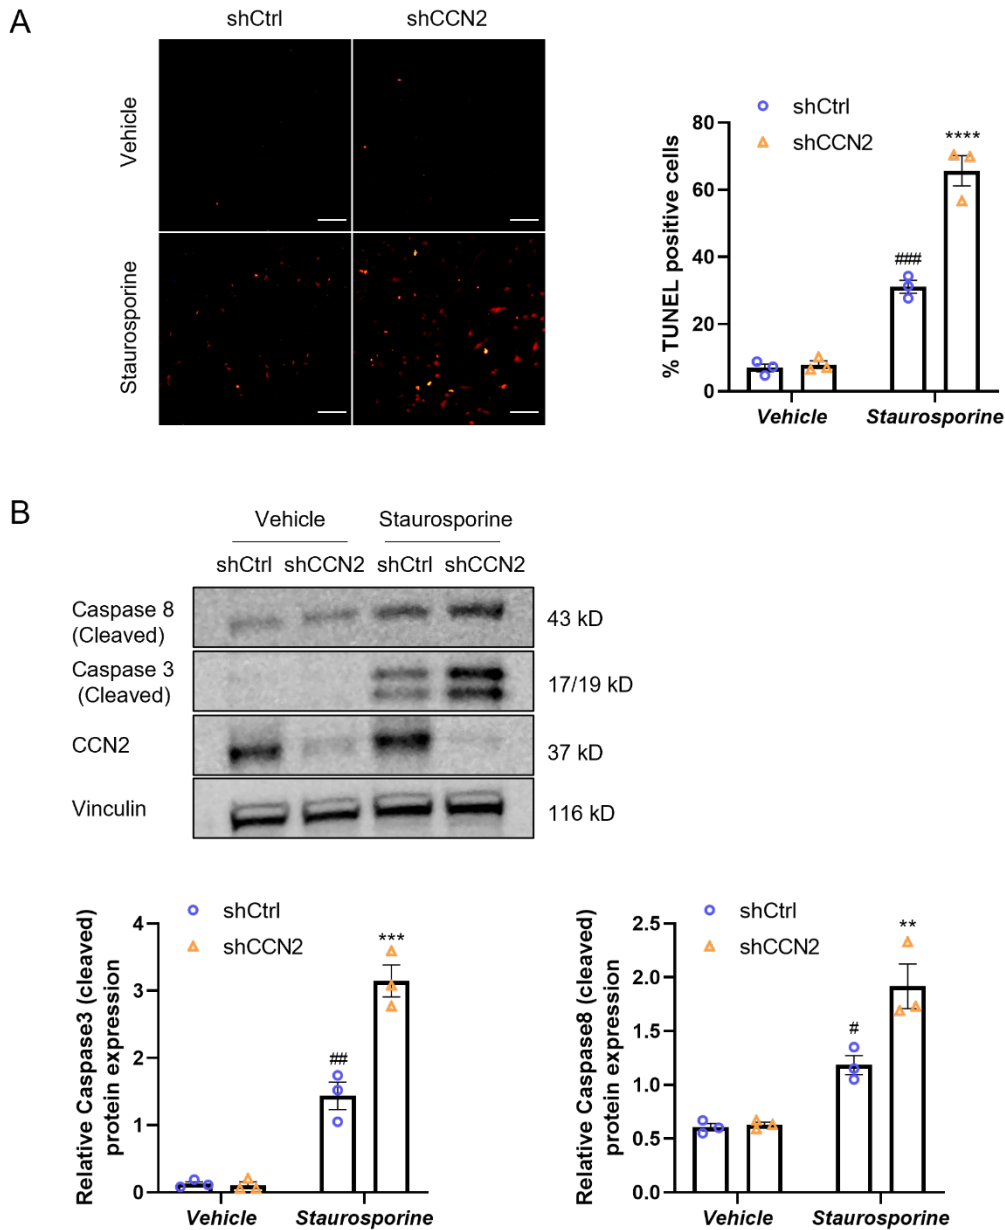

**Figure S4. SMC-specific deficiency of CCN2 exacerbates cell apoptosis in vitro. (A)** Representative images of TUNEL stained control and CCN2 deficient HASMCs treated with Vehicle or Staurosporine (n=3). Apoptotic cells were stained red. Scale bar, 100 $\mu$ m. **(B)** Western blot analysis of the active forms of caspase 8 and caspase 3 in control and CCN2 deficient HASMCs treated with Vehicle or Staurosporine (n=3). Target protein levels were normalized to vinculin. Data were quantified and represented as mean  $\pm$  SEM. \*\*, P<0.01, \*\*\*, P<0.001, \*\*\*\*, P<0.0001, effect of CCN2 deficiency within same treatment group; #, p<0.05, ##, p<0.01, ###, p<0.001, effect of Staurosporine within same genotype group, 2-way ANOVA.

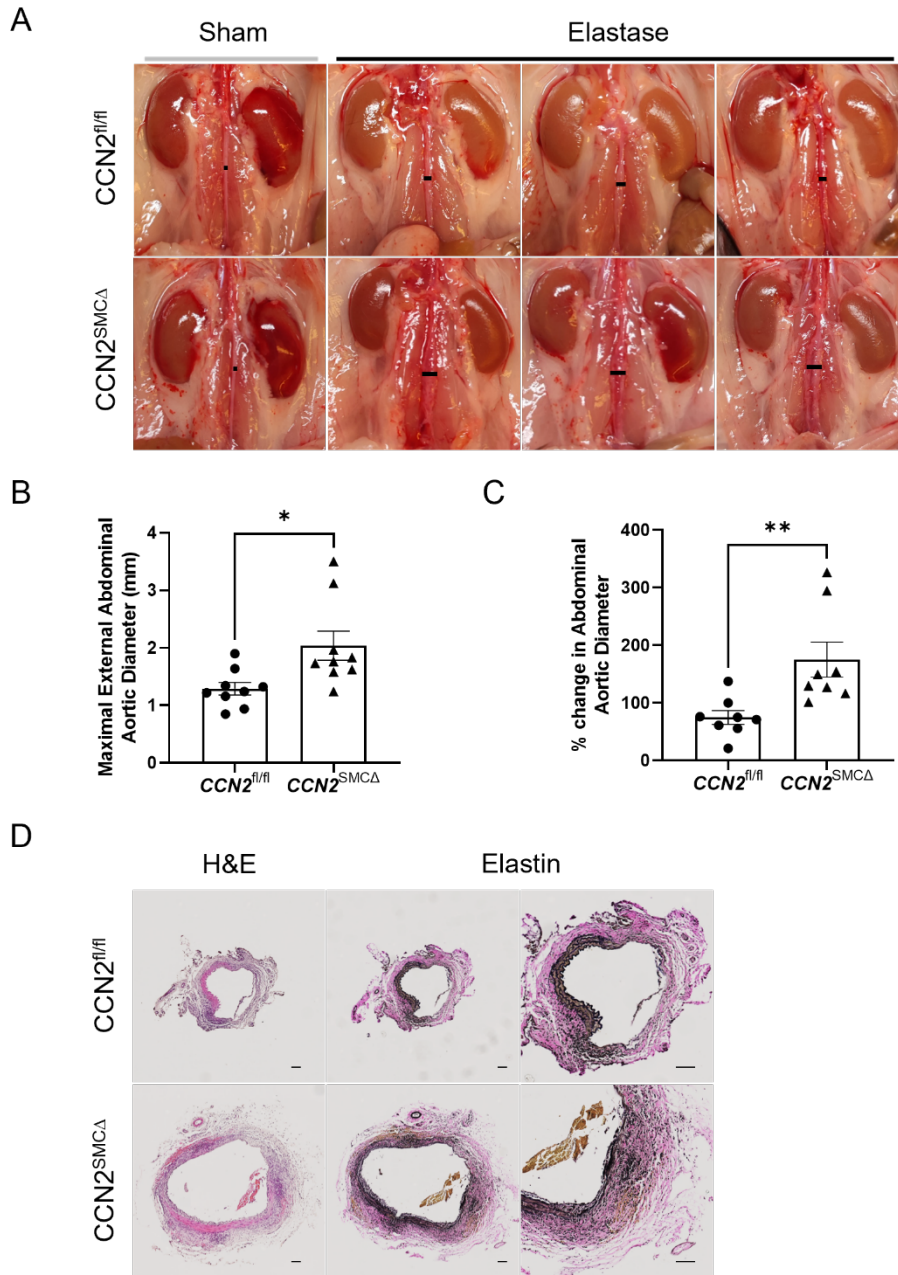

**Figure S5. Exacerbation of elastase-BAPN induced infrarenal aortic aneurysm in CCN2<sup>SMCΔ</sup> mice.** (A) Representative gross images of abdominal aortas from sham-operated (n=3) and elastase-BAPN treated CCN2<sup>fl/fl</sup> and CCN2<sup>SMCΔ</sup> mice (n=9). (B) Maximal external aortic diameters at study endpoint in mice from both groups. (C) % change in maximal external aortic diameters. Data were quantified and represented as mean ± SEM, \*, P<0.05, \*\*, P<0.01, 2-tailed Student's t test. (D) Representative images of H&E-stained (5x) and Elastin-stained (5x and 10x) abdominal aortic sections from both groups (n=5). Scale bars, 100 μm.

## Supplemental Tables

**Table 1. List of primers used**

| <b>Gene Name (Mus)</b>  | <b>Primer sequence (Forward 5' to 3')</b> | <b>Primer sequence (Reverse 5' to 3')</b> |
|-------------------------|-------------------------------------------|-------------------------------------------|
| Ccn2                    | TGACCTGGAGGAAAACATTAAGA                   | AGCCCTGTATGTCTTCACACTG                    |
| Myh11                   | GGGTAGCCAAGAAGCTGGTGT                     | TTTTCCACCAACTCCACGACC                     |
| Acta2                   | CCCACCCAGAGTGGAGAA                        | ACATAGCTGGAGCAGCGTCT                      |
| Cnn1                    | GAAGGTCAATGAGTCAACTCAGAA                  | CCATACTTGTAATGGCTTTGA                     |
| Tagln (Sm22)            | CCTTCCAGTCCACAAACGAC                      | GTAGGATGGACCCTTGTTGG                      |
| Eln                     | TGGAGCAGGACTTGGAGGT                       | CCTCCAGCACCATACTTAGCA                     |
| Fn1                     | ATGTGGACCCCTCCTGATAGT                     | GCCCAGTGATTTTCAGCAAAGG                    |
| Lgals3                  | TCCTGGTTGAAGCTGACCAC                      | CGCTGGTGAGGGTTATGTCA                      |
| Tnf                     | AGTCCGGGCAGGTCTACTTT                      | GAGTTGGACCCTGAGCCATA                      |
| Gapdh                   | CATGGCCTTCCGTGTTCTTA                      | CCTGCTTCACCACCTTCTTGAT                    |
| Actb                    | CGCCACCAGTTCGCCATGGA                      | TACAGCCCGGGGAGCATCGT                      |
| <b>Gene Name (Homo)</b> | <b>Primer sequence (Forward 5' to 3')</b> | <b>Primer sequence (Reverse 5' to 3')</b> |
| TGFBR1                  | GTGACAGATGGGCTCTGCTT                      | AAGGGCCAGTAGTTGGAAGT                      |
| TGFBR2                  | GCACGTTCAGAAGTCGGATG                      | CTGCACCGTTGTTGTCAGTG                      |
| ACTA2                   | GCGTGTAGCACCTGAAGAG                       | GAATGGCGACGTACATGGCA                      |
| TAGLN (SM22)            | CACTGGCAGTTATAGGTGTTGAC                   | CCCACCCAGATTCATCAGCG                      |
| GAPDH                   | AGCCACATCGCTCAGACAC                       | GCCCAATACGACCAAATCC                       |

**Table 2. List of antibodies used**

| Target antigen                       | Vendor/Source             | Catalog # | Working dilution |
|--------------------------------------|---------------------------|-----------|------------------|
| CCN2                                 | Cell signaling Technology | 10095     | 1:500            |
| SMMHC                                | Abcam                     | ab53219   | 1:500            |
| $\alpha$ SMA                         | Cell signaling Technology | 56856     | 1:1000           |
| SM22                                 | Cell signaling Technology | 40471     | 1:5000           |
| Calponin                             | Cell signaling Technology | 17819     | 1:500            |
| KLF4                                 | R&D Systems               | AF3158    | 1:500            |
| p-SRF                                | Cell signaling Technology | 4261      | 1:500            |
| TGF $\beta$ 1                        | Abcam                     | ab92468   | 1:500            |
| TGFBR2                               | Cell signaling Technology | 41896     | 1:500            |
| p-TGFBR2                             | Abcam                     | ab183037  | 1:500            |
| p-Smad3                              | Abcam                     | ab52903   | 1:500            |
| Caspase 8 (cleaved)                  | Cell signaling Technology | 9746      | 1:500            |
| Caspase 3 (Cleaved)                  | Cell signaling Technology | 9661      | 1:500            |
| GAPDH                                | Santa Cruz                | sc-365062 | 1:1000           |
| $\beta$ -actin                       | Cell signaling Technology | 3700      | 1:10000          |
| Vinculin                             | Sigma-Aldric              | V9131     | 1:3000           |
| SMMHC (IF)                           | Abcam                     | ab125884  | 1:500            |
| $\alpha$ SMA-Alexa 594 (IF)          | Abcam                     | ab202368  | 1:500            |
| Ki67 (IF)                            | Abcam                     | ab15580   | 1:500            |
| CD68 (IF)                            | Bio-Rad                   | MCA1957GA | 1:500            |
| Vimentin (IF)                        | Sigma-Aldric              | AB1620    | 1:50             |
| CD45                                 | BD Biosciences            | 550539    | 1:100            |
| CD31                                 | BD Biosciences            | 553370    | 1:100            |
| COL1A1                               | Cell signaling Technology | 72026     | 1:100            |
| Alexa Fluor 488 goat anti-rat IgG    | Invitrogen                | A11006    | 1:1000           |
| Alexa Fluor 488 goat anti-rabbit IgG | Invitrogen                | A11008    | 1:1000           |
| Anti-mouse IgG-HRP                   | Cell signaling Technology | 7076      | 1:5000           |
| Anti-Rabbit IgG-HRP                  | Cell signaling Technology | 7074      | 1:5000           |
